# Supplementary material for: Widening the applications of the Just-Dip-It approach: a solid contact screen-printed ion-selective electrode for the real-time assessment of pharmaceutical dissolution testing in comparison to off-line HPLC analysis
Source: Royal Society of Chemistry journal article supplement (doi:10.1039/d1ra00040c), 2021-01-01
Supplement: d1ra00040c1.pdf [file d1ra00040c1.pdf]

### Supplementary data

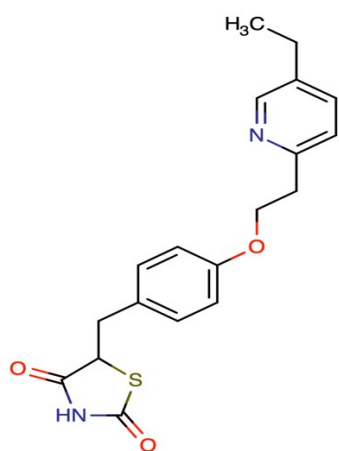

*Pioglitazone*

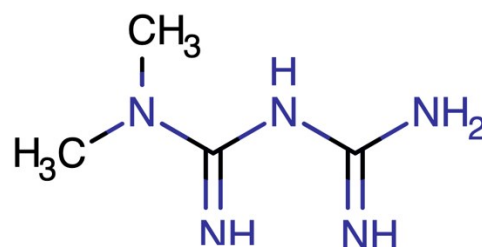

*Alogliptin*

**Figure (1S):** chemical structures of Pioglitazone and Alogliptin.

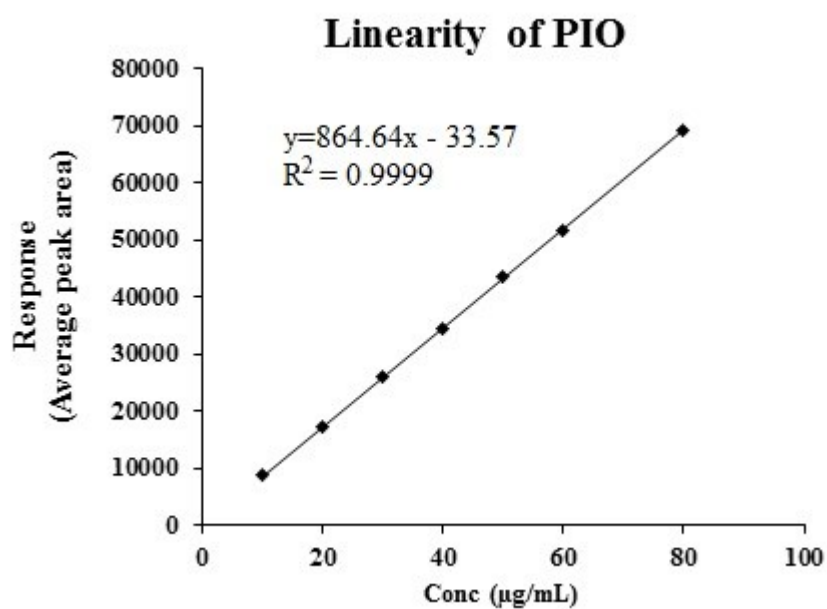

**Figure (2S):** HPLC calibration curve for PIO.

**Table (1S):** System suitability parameters for the determination of ALG and PIO by proposed HPLC method.

| System suitability parameters | Result N=(6) Mean $\pm$ RSD |                      |
|-------------------------------|-----------------------------|----------------------|
|                               | ALG                         | PIO                  |
| Retention time                | 1.17 $\pm$ 0.00             | 2.82 $\pm$ 0.09      |
| Tailing factor                | 1.00 $\pm$ 0.01             | 1.01 $\pm$ 0.01      |
| Theoretical plates            | 4771.28 $\pm$ 29.73         | 4265.18 $\pm$ 180.07 |
| Capacity factor (K')          | 4.31 $\pm$ 0.00             | 13.84 $\pm$ 0.01     |
| Rs (resolution)               | 6.6                         |                      |
